# Supplementary material
Source: publisher site journal article supplement (https://www.dovepress.com/article/349966)
Supplement: Supplementary file 1 [file get_supplementary_file.php]

**Supplementary materials**

**Table S1. Patients’ background and characteristics from our center**

| Characteristics | No. of cases (Percentage) |
| --- | --- |
| Total case | 60 |
| Gender |  |
| Male | 49(81.7.0%) |
| Female | 11(18.3.0%) |
| Age |  |
| <=60 | 21(35.0%) |
| >60 | 39(65.0%) |
| TNM stage |  |
| Stage I | 22(36.7%) |
| Stage II | 12(20.0%) |
| Stage III | 21(35.0%) |
| Stage IV | 5(8.3%) |
| Histologic grade |  |
| G1 | 2(3.3%) |
| G2 | 31(51.7%) |
| G3 | 27(45.0%) |
| AFP (ng/mL) |  |
| <=400 | 17(28.3%) |
| >400 | 43(71.7%) |
| Child-Pugh grade |  |
| A | 56(93.3%) |
| B | 4(6.7%) |
| Fibrosis |  |
| Yse | 28(46.7%) |
| No | 32(53.3%) |

| Antibody name | Source |  |
| --- | --- | --- |
| SLC39A1 (1:1000) | YT4947, ImmunoWay |  |
| Tubulin (1:1000) | 10068-1-AP, Proteintech |  |
| MMP2 (1:1000) | A6247, Abclonal |  |
| N-cadherin (1:1000) | BS72312, Bioworld |  |
| CyclinD1 (1:1000) | 55506T, Cell Signaling Technology |  |
| Wnt3A (1:1000) | 36351, SAB |  |
| p-GSK3β (1:1000) | 5558T, Cell Signaling Technology |  |
| t-GSK3β (1:1000) | YT2082, ImumnoWay |  |
| β-catenin (1:1000) | 8480T, Cell Signaling Technology |  |

**Table S2. Antibody used in this study**

**Figure S1.**


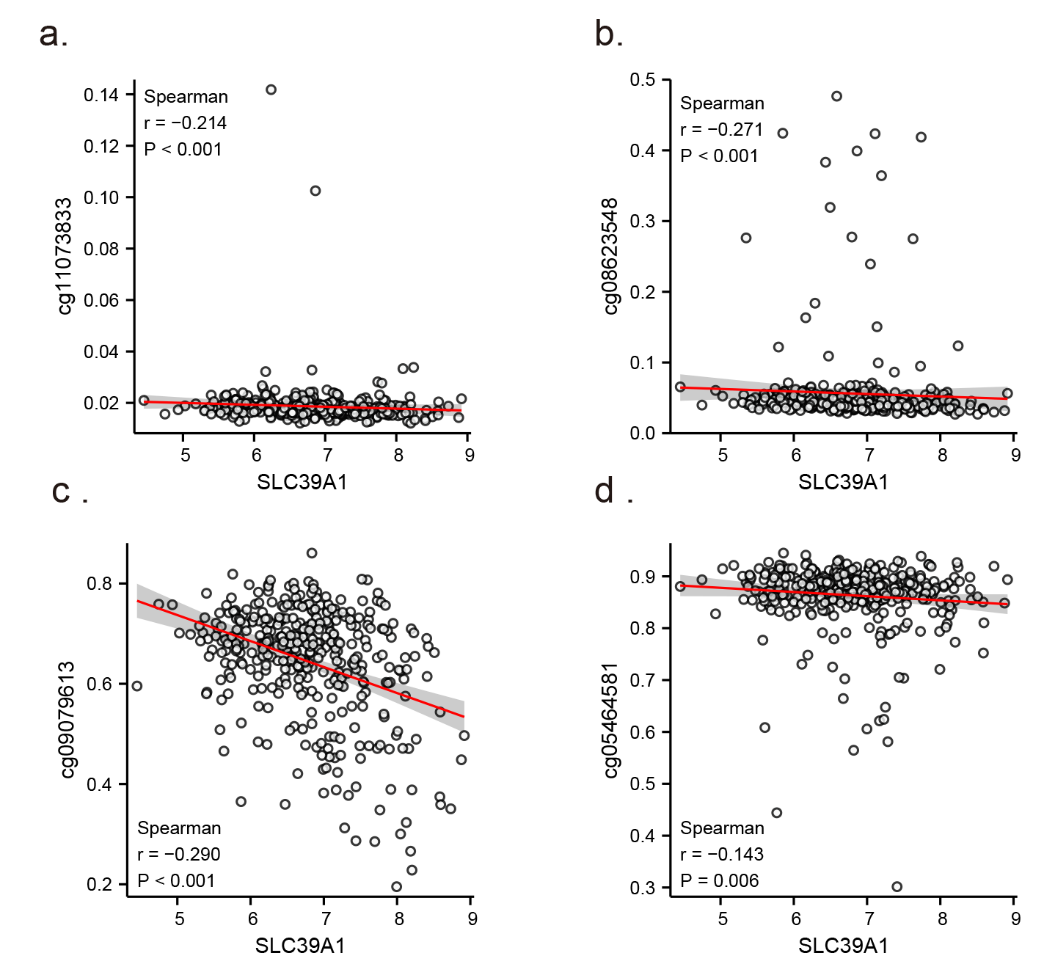


Figure S1 The correlation between SLC39A1 and methylation. (a-d) The negative correlation between SLC39A1 expression and methylation of cg11073833 (a), cg08623548 (b), cg09079613 (c) and cg05464581 (d).
